# Supplementary material for: Soil-derived fulvic acid and root exudates, modified by soil bacteria, alter CuO nanoparticle-induced root stunting of wheat via Cu complexation
Source: Royal Society of Chemistry journal article supplement (doi:10.1039/c9en00728h), 2019-01-01
Supplement: c9en00728h1.pdf [file c9en00728h1.pdf]

1  
2  
3  
4  
5  
6  
7  
8  
9  
10  
11  
12  
13  
14  
15  
16  
17

Supplementary Information:  
Agricultural soil pore waters reduce copper  
oxide nanoparticle-induced root shortening  
in wheat

---

J. M. Hortin, A. J. Anderson, D. W. Britt, A. R. Jacobson, J. E. McLean

Table S1: Experimental setup for non-*PcO6* experiment; + = present and - = absent.

| Group                 | Treatment | Wheat | CuO | <i>PcO6</i> | 3.4 mM<br>Ca(NO <sub>3</sub> ) <sub>2</sub> | AgrM<br>SPW | OrgM<br>SPW | GarM<br>SPW |
|-----------------------|-----------|-------|-----|-------------|---------------------------------------------|-------------|-------------|-------------|
| Wheat<br>controls     | 1         | +     | -   | -           | +                                           | -           | -           | -           |
|                       | 2         | +     | -   | -           | -                                           | +           | -           | -           |
|                       | 3         | +     | -   | -           | -                                           | -           | +           | -           |
|                       | 4         | +     | -   | -           | -                                           | -           | -           | +           |
| CuO NPs<br>controls   | 5         | -     | +   | -           | +                                           | -           | -           | -           |
|                       | 6         | -     | +   | -           | -                                           | +           | -           | -           |
|                       | 7         | -     | +   | -           | -                                           | -           | +           | -           |
|                       | 8         | -     | +   | -           | -                                           | -           | -           | +           |
| SPW<br>controls       | 9         | -     | -   | -           | +                                           | -           | -           | -           |
|                       | 10        | -     | -   | -           | -                                           | +           | -           | -           |
|                       | 11        | -     | -   | -           | -                                           | -           | +           | -           |
|                       | 12        | -     | -   | -           | -                                           | -           | -           | +           |
| CuO NPs<br>treatments | 13        | +     | +   | -           | +                                           | -           | -           | -           |
|                       | 14        | +     | +   | -           | -                                           | +           | -           | -           |
|                       | 15        | +     | +   | -           | -                                           | -           | +           | -           |
|                       | 16        | +     | +   | -           | -                                           | -           | -           | +           |

Table S2: Experimental setup for plants with *PcO6* colonization; + = present and - = absent.

| PcO6 experiment setup |           |       |     |             |                                             |             |             |             |
|-----------------------|-----------|-------|-----|-------------|---------------------------------------------|-------------|-------------|-------------|
| Group                 | Treatment | Wheat | CuO | <i>PcO6</i> | 3.4 mM<br>Ca(NO <sub>3</sub> ) <sub>2</sub> | AgrM<br>SPW | OrgM<br>SPW | GarM<br>SPW |
| Wheat<br>controls     | 1         | +     | -   | +           | +                                           | -           | -           | -           |
|                       | 2         | +     | -   | +           | -                                           | +           | -           | -           |
|                       | 3         | +     | -   | +           | -                                           | -           | +           | -           |
|                       | 4         | +     | -   | +           | -                                           | -           | -           | +           |
| CuO NPs<br>controls   | 5         | -     | +   | +           | +                                           | -           | -           | -           |
|                       | 6         | -     | +   | +           | -                                           | +           | -           | -           |
|                       | 7         | -     | +   | +           | -                                           | -           | +           | -           |
|                       | 8         | -     | +   | +           | -                                           | -           | -           | +           |
| SPW<br>controls       | 9         | -     | -   | +           | +                                           | -           | -           | -           |
|                       | 10        | -     | -   | +           | -                                           | +           | -           | -           |
|                       | 11        | -     | -   | +           | -                                           | -           | +           | -           |
|                       | 12        | -     | -   | +           | -                                           | -           | -           | +           |
| CuO NPs<br>treatments | 13        | +     | +   | +           | +                                           | -           | -           | -           |
|                       | 14        | +     | +   | +           | -                                           | +           | -           | -           |
|                       | 15        | +     | +   | +           | -                                           | -           | +           | -           |
|                       | 16        | +     | +   | +           | -                                           | -           | -           | +           |

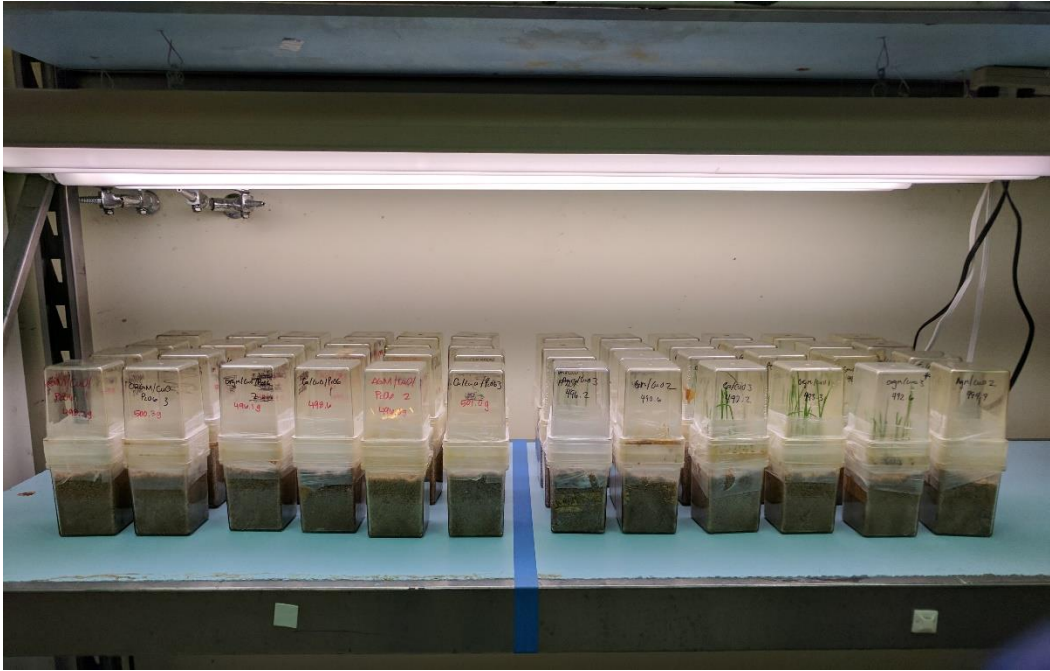

20  
21

Fig. S1: Setup of 48 magenta boxes under grow lights, with/without wheat.

22 Table S3: Characteristics of soils. Soil samples were collected in 2014 for preliminary  
 23 experiments in 2015-2016 and tested at a laboratory certified under the North American  
 24 Proficiency Testing Program for Agricultural Labs. Soils were re-collected in 2016 for use in  
 25 this study.

| Soil characteristics                                |                                             |                                                   |                                                  |
|-----------------------------------------------------|---------------------------------------------|---------------------------------------------------|--------------------------------------------------|
| Soil abbreviation                                   | OrgM                                        | AgrM                                              | GarM                                             |
| Name origin                                         | <u>Organic</u><br>farm,<br><u>Millville</u> | <u>Agricultural</u><br>field,<br><u>Millville</u> | Community<br><u>garden</u> ,<br><u>Millville</u> |
| Soil series, texture                                | Millville<br>silt loam                      | Millville<br>silt loam                            | Millville silt<br>loam                           |
| Particle size<br>distribution<br>(% sand/silt/clay) | 19/56/26                                    | 22/56/23                                          | 13/59/28                                         |
| Cultivation                                         | organic<br>certified                        | commercial<br>production                          | unknown<br>amendments                            |
| Crop                                                | continuous<br>green<br>cover                | winter<br>wheat                                   | varied<br>(community<br>garden)                  |
| pH                                                  | 7.7                                         | 7.8                                               | 7.8                                              |
| EC ( $\mu\text{S}/\text{cm}$ )                      | 1040                                        | 500                                               | 600                                              |
| Phosphorus (mg/kg)                                  | 52.1                                        | 10.1                                              | 19.3                                             |
| Potassium (mg/kg)                                   | 434                                         | 111                                               | 369                                              |
| Ammonium (mg/kg N)                                  | 2.01                                        | 2.43                                              | < 1.25                                           |
| Nitrate (mg/kg N)                                   | 31.8                                        | 11.5                                              | 10.4                                             |
| Sulfate (mg/kg S)                                   | 6.5                                         | 3.6                                               | 3.3                                              |
| Organic matter (% of<br>whole soil)                 | 5.6                                         | 3.0                                               | 4.1                                              |
| Cation exchange<br>capacity (cmol/kg)               | 20.0                                        | 13.8                                              | 21.0                                             |
| Calcium carbonate (%)                               | 14.6                                        | 14.1                                              | 16.1                                             |
| Saturation point (%)                                | 46.5                                        | 41.0                                              | 45.5                                             |
| DTPA – Fe (mg/kg)                                   | 9.8                                         | 8.95                                              | 10.5                                             |
| DTPA – Cu (mg/kg)                                   | 1.44                                        | 1.29                                              | 2.72                                             |
| DTPA – Mn (mg/kg)                                   | 16.3                                        | 14.1                                              | 13.8                                             |
| DTPA – Zn (mg/kg)                                   | 3.07                                        | 1.66                                              | 1.62                                             |

27 Table S4: Full characterization of SPWs. Measurements = average of 3 replicates. “<” = below  
 28 detection, followed by detection limit.

| Soil name                                | OrgM  | AgrM  | GarM   |
|------------------------------------------|-------|-------|--------|
| Na (mg/L)                                | 11.8  | 9.4   | 27.5   |
| Mg (mg/L)                                | 55.7  | 17.9  | 145.9  |
| Al (µg/L)                                | 8.3   | 6.9   | <4     |
| K (mg/L)                                 | 28.7  | 4.2   | 299.1  |
| Ca (mg/L)                                | 167.6 | 97.4  | 372.3  |
| V (µg/L)                                 | 5.2   | 5.4   | 7.5    |
| Cr (µg/L)                                | 9.6   | 1.1   | 1.5    |
| Mn (µg/L)                                | 5.5   | 12.4  | 118.0  |
| Fe (µg/L)                                | 67.1  | 14.6  | 53.9   |
| Co (µg/L)                                | 1.6   | 1.5   | 11.1   |
| Ni (µg/L)                                | 5.7   | 6.7   | 20.3   |
| Cu (µg/L)                                | 13.4  | 22.8  | 48.4   |
| Zn (µg/L)                                | 51.1  | 34.1  | 48.7   |
| As (µg/L)                                | 7.2   | 6.1   | 18.8   |
| Se (µg/L)                                | 1.0   | 4.3   | 1.8    |
| Sr (µg/L)                                | 668.7 | 97.7  | 1124.0 |
| Ba (µg/L)                                | 402.0 | 161.6 | 640.4  |
| Gluconate (mg/L)                         | 1.9   | 3.9   | < 0.5  |
| Lactate (mg/L)                           | < 0.5 | < 0.5 | < 0.5  |
| Acetate (mg/L)                           | 0.7   | < 0.5 | < 0.5  |
| Isobutyrate (mg/L)                       | < 0.5 | < 0.5 | <0.5   |
| Butyrate (mg/L)                          | < 0.5 | < 0.5 | 1.03   |
| Isovalerate (mg/L)                       | < 0.5 | < 0.5 | <0.5   |
| Valerate (mg/L)                          | < 0.5 | < 0.5 | < 0.5  |
| Chloride (mg/L)                          | 50.2  | 5.6   | 61.6   |
| Nitrite (mg/L N)                         | 5.7   | 11.8  | 2.80   |
| Nitrate (mg/L N)                         | 148.6 | 12.6  | 573.8  |
| Sulfate (mg/L)                           | 36.8  | 18.4  | 194.8  |
| Oxalate (mg/L)                           | < 0.5 | < 0.5 | < 0.5  |
| Phosphate (mg/L P)                       | < 0.5 | < 0.5 | 1.99   |
| Citrate (mg/L)                           | < 0.5 | < 0.5 | < 0.5  |
| Alkalinity (mg /L<br>CaCO <sub>3</sub> ) | 340   | 450   | 490    |
| EC (µS/cm)                               | 735   | 391   | 3380   |
| DOC (mg/L C)                             | 42.7  | 73.4  | 305    |
| Humic acids (mg/L C)                     | <0.8  | <0.8  | 4.3    |
| Fulvic acids (mg/L C)                    | 28.3  | 38.0  | 165    |

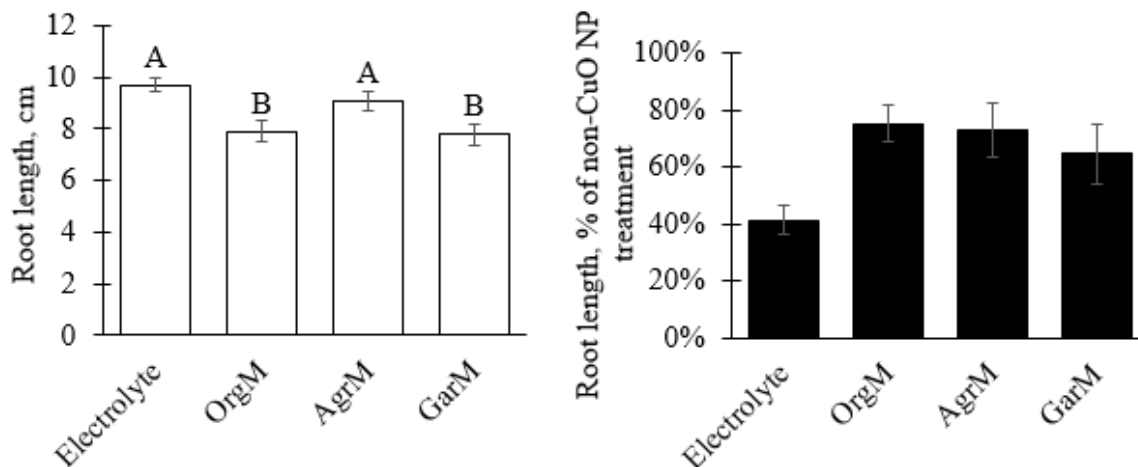

29  
 30 Fig. S2. Root length of wheat plants grown in non-CuO NP treatments (left) and root length of  
 31 wheat plants grown with CuO NPs normalized to the non-CuO NP treatment root length. The  
 32 error bars show 95% confidence intervals ( $n = 12$  per bar) to illustrate the spread of data, but do  
 33 not determine significant differences. Bars with differing letters (A, B, etc.) are statistically  
 34 different ( $p < 0.05$ ) by Tukey's HSD after two-way ANOVA. All root metals required a  
 35 logarithmic transformation to maintain normal distribution of residuals.

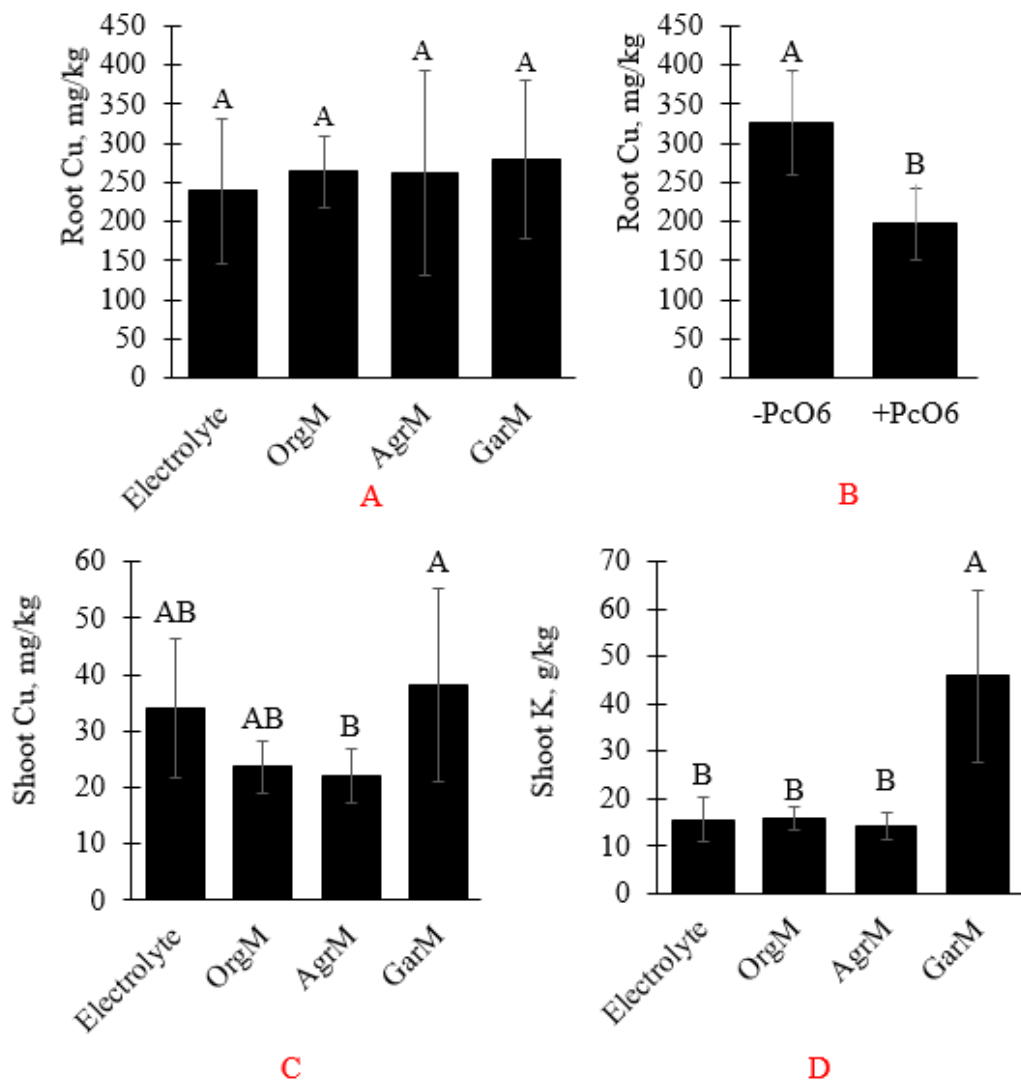

36  
 37  
 38  
 39  
 40  
 41  
 42  
 43  
 44  
 45  
 46  
 47  
 48  
 49  
 50  
 51

Fig. S3. Root and shoot metal contents in plants grown with CuO NPs as affected by RS (A, C, D) or PcO6 (B). Bars are average of 12 (A, C, D) or 24 (B) pooled replicates. The error bars show 95% confidence intervals to illustrate the spread of data, but do not determine significant differences. Bars with differing letters (A, B, etc.) are statistically different ( $p < 0.05$ ) by Tukey's HSD after two-way ANOVA. All root metals required a logarithmic transformation to maintain normal distribution of residuals.

52 Table S5 Number of contaminated boxes by RS and presence/absence of wheat, CuO NPs, and  
 53 *PcO6*. Each cell contains a maximum of six boxes.

| RS            | Planted     |                  |             |                  | Unplanted   |                  |             |                  | Totals |
|---------------|-------------|------------------|-------------|------------------|-------------|------------------|-------------|------------------|--------|
|               | CuO NPs     |                  | Non-CuO NPs |                  | CuO NPs     |                  | Non-CuO NPs |                  |        |
|               | <i>PcO6</i> | Non- <i>PcO6</i> |        |
| Control       | 0           | 5                | 0           | 6                | 0           | 0                | 0           | 3                | 14     |
| OrgM          | 0           | 6                | 0           | 6                | 0           | 0                | 0           | 4                | 16     |
| AgrM          | 0           | 5                | 1           | 5                | 0           | 0                | 0           | 3                | 14     |
| GarM          | 0           | 6                | 0           | 6                | 0           | 1                | 0           | 3                | 16     |
| <b>Totals</b> | 0           | 22               | 1           | 23               | 0           | 1                | 0           | 13               | 60     |

54

55 **Discussion of bacterial contamination in this study**

56 *PcO6* formed wet, orange colonies on Luria Broth (LB) medium, whereas  
 57 contaminating bacteria took many differing forms. Under these conditions, contamination in  
 58 the growth boxes could not be completely avoided, even with autoclaving of the boxes and  
 59 sand before use, thorough surface sterilization of the seeds and initial growth on sterile LB  
 60 plates, and aseptic techniques. The contamination was spread evenly across RS types (29-  
 61 35%), but were primarily found in planted samples compared to unplanted samples (48%  
 62 versus 15%), non-*PcO6* samples compared to *PcO6* samples (61% versus 1%), and non-CuO  
 63 NP samples compared to CuO NP samples (39% versus 24%) (Table S5). By a chi-squared  
 64 test, RS type did not significantly impact contamination rates, but the presence of wheat ( $p <$   
 65  $0.0001$ ), the lack of CuO NPs ( $p = 0.0287$ ), and the lack of *PcO6* ( $p < 0.0001$ ) increased  
 66 contamination rates.

67 The even distribution of infection across all RSs indicated the SPWs were not the likely  
 68 source. Most likely, endophytes living inside the seed grew after transplanting despite the  
 69 described precautions. Endophytes are common in wheat and often these isolates have  
 70 biocontrol activity (Díaz Herrera et al. 2016; Comby et al. 2017). The toxicity of CuO NPs to a  
 71 variety of microbes (as seen in soils by Frenk et al. 2013, for example) and the competitive  
 72 native *PcO6* against the microbes explains the lower rates of infection in treatments with each  
 73 of those two variables.



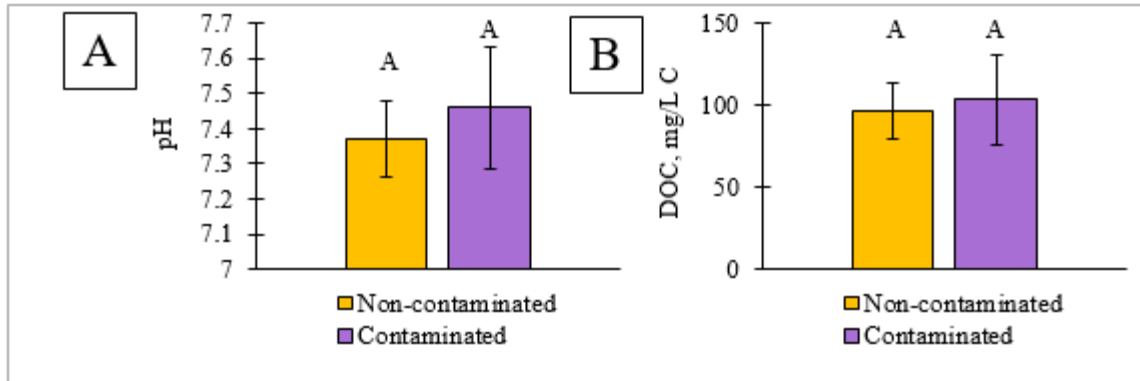

74  
75  
76  
77  
78

Fig. S4: pH (A) and DOC (B) in contaminated versus non-contaminated samples without wheat, *PcO6*, or CuO NPs. Bars represent the mean of measurements and error bars represent Tukey HSD statistical significance. No significant changes occurred between sterile (non-*PcO6*) and contaminated samples (typically also non-*PcO6*).



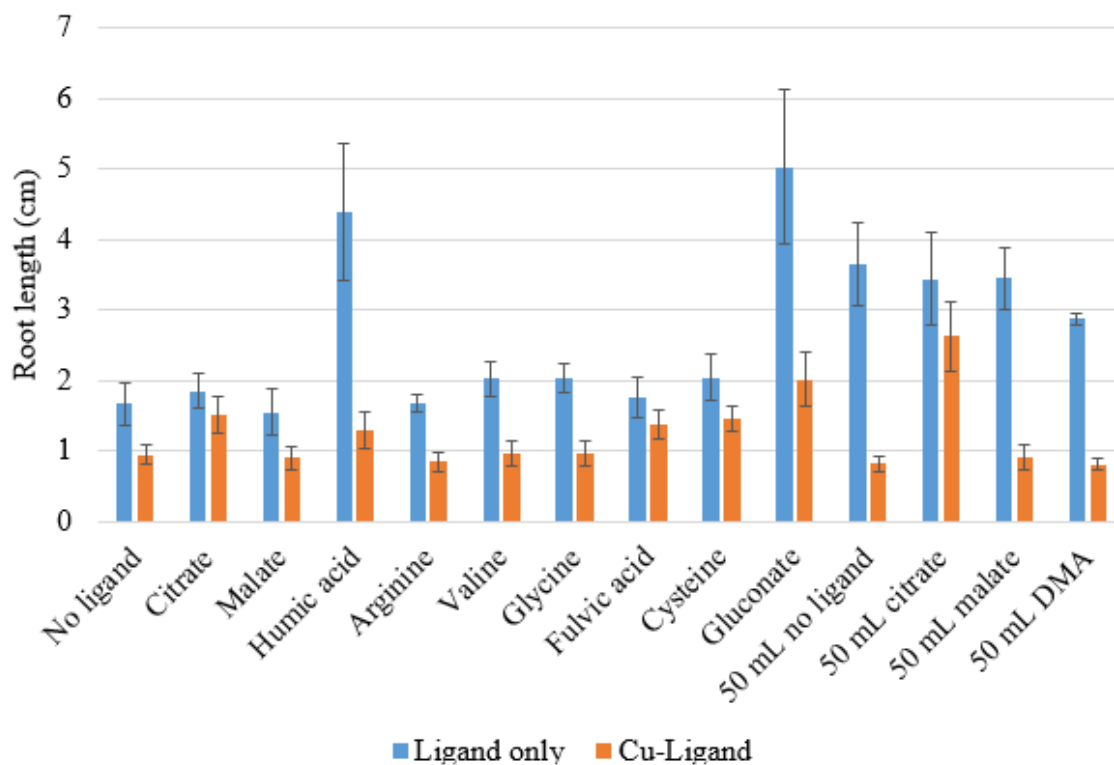

80  
 81 Fig. S5: Root lengths of wheat exposed for 48 h to 1.6  $\mu\text{M}$  Cu and ligand (orange) or ligand  
 82 only with no Cu (blue). Bars are average of 3 samples and error bars represent the standard  
 83 error of the mean. NRE is calculated by dividing the (Cu-ligand root – 0.75 cm) by (ligand root  
 84 – 0.75 cm), shown in Table 2 of the text. The test was conducted in 1 L solution except for the  
 85 50 mL samples on the far right. The 50 mL no ligand, malate, and citrate tests were conducted  
 86 to show that while the smaller volume appeared to influence root length, the same NRE results  
 87 were obtained in 50 mL as in 1 L. Ligand concentration and calculated Cu speciation are shown  
 88 in Table 2 of the article.
